# Supplementary material
Source: Springer Nature journal article supplement (https://www.springermedizin.de/resource/supplementary/12882_2011_268_MOESM10_ESM.pdf/9453484)

**G**

□ Wild ■ Acatalasemic

HNE positive area (%)

30.0

20.0

10.0

0.0

week 0

week 4

week 8

## \*\*

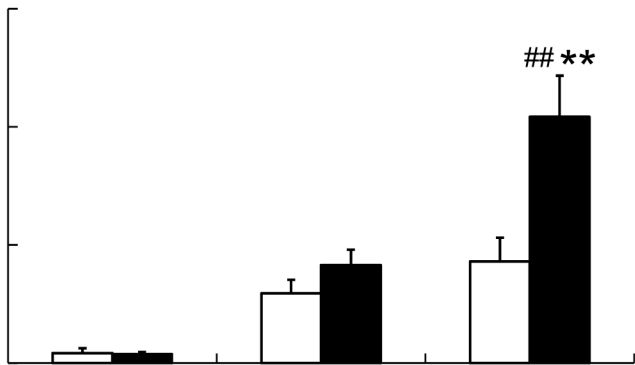

Supplement: MOESM10 [file 9453484]
